# Supplementary material for: PHY906(KD018), an adjuvant based on a 1800-year-old Chinese medicine, enhanced the anti-tumor activity of Sorafenib by changing the tumor microenvironment
Source: PubMed Central journal article supplement (PMC4377583; doi:10.1038/srep09384), 2015-03-30
Supplement: srep09384-s1.pdf [file srep09384-s1.pdf]

**PHY906(KD018), an adjuvant based on a 1800-year-old Chinese medicine, enhanced the anti-tumor activity of Sorafenib by changing the tumor microenvironment**

Wing Lam<sup>1+</sup>, Zaoli Jiang<sup>1+</sup>, Fulan Guan<sup>1+</sup>, Xiu Huang<sup>2</sup>, Rong Hu<sup>1</sup>, Jing Wang<sup>1</sup>, Scott Bussom<sup>1</sup>, Shwu-Huey Liu<sup>3</sup>, Hongyu Zhao<sup>2</sup>, Yun Yen<sup>4</sup> and Yung-Chi Cheng<sup>1\*</sup>

<sup>1</sup>Department of Pharmacology

<sup>2</sup>Department of Computational Biology and Bioinformatics

Yale University School of Medicine, New Haven, Connecticut 06510, USA

<sup>3</sup>PhytoCeutica Inc. Branford, Connecticut 06405, USA

<sup>4</sup> Department of Molecular Pharmacology. City of Hope, Duarte, California, USA.

## Supplementary Method

**Table. 1** Comparison of different lot of PHY906 and HQT-F (commercial *Huang-Qin Tang*) using Phytomics Similarity Index (PSI).

|           | MS   | UV   |
|-----------|------|------|
| PHY906-6  | 1    | 1    |
| PHY906-7  | 0.99 | 0.98 |
| PHY906-8  | 0.99 | 0.99 |
| PHY906-10 | 0.97 | 0.96 |
| HQT-F     | 0.81 | 0.76 |

**MS = PSI determined by comparison of mass spectrum of different lot of PHY906.**

**UV = PSI determined by comparison of UV spectrum of different lot of PHY906.**

**where 1=completely the same, 0=completely different**

**Table. 2 qPCR primers list.**

|               | Forward primer             | Reverse primer             |
|---------------|----------------------------|----------------------------|
| hActin        | GCCACGGCTGCTTCCAGCTCC      | TTGTGCTGGGTGCCAGGGCAGTGA   |
| mActin        | TCCTTCTTGGGTATGGAATCCT     | TTGTGCTGGGTGCCAGGGCAGTGA   |
| hFasR         | AGCTTGGTCTAGAGTGAAAA       | GAGGCAGAATCATGAGATAT       |
| hTNFaR        | TGCCTACCCCAGATTGAGAA       | ATTTCCACAAAACAATGGAGTAG    |
| hDR3          | CAAGGCGAAGAAGCACGAAC       | GCCGAGAAGTTGAGAAAATGTCT    |
| hDR4          | CTGATGAAATGGGTCAACAA       | AACTTTCCAGAGTCCACCAA       |
| hDR5          | AAGACCCTTGTGCTCGTTGT       | CCAGGTGGACACAATCCCTC       |
| hTNFa         | CCTGCCCAATCCCTTTATT        | CCCTAAGCCCCAATTCTCT        |
| hAPO3L        | TGTTGATTCTGGCTTCCTCC       | ACCTAAAGGCCGGAAAACAC       |
| hTrail        | GAGCTGAAGCAGATGCAGGAC      | TGACGGAGTTGCCACTTGACT      |
| mFasL         | GTGGGGGTTCCCTGTAAAT        | ACTCCGTGAGTTACCAACC        |
| mTrail        | TGGAGTCCCAGAAATCCTCA       | TCACCAACGAGATGAAGCAG       |
| hMCP1(CCL2)   | GTCTCTGCCGCCCTTCTGT        | TTGCATCTGGGTGAGCGAG        |
| hMCSF         | CCAGCAACTGGAGAGGTGTC       | GCAGCTGCAGGAACCTCTT        |
| hMIF1a        | GAAGCCATGAGCTGGTC          | GGTTCCTCTCCGAGCTCAC        |
| hMIP1a(CCL3)  | ACAGTGTGTTTGTGATTGTTTGCTC  | AGCCACTCGGTTGTCACCAG       |
| hMIP1b(CCL4)  | GATTCACTGGGATCAGCACA       | CTTTTCTTACACCCGAGGA        |
| hRantes(CCL5) | CAGGGCTCTGTGACCAGGAA       | ACGGCGGAAGCTTAAGAGT        |
| mMCP1(CCL2)   | GGCTGGAGCATCCACGTGTT       | TGGTGACAAAACTACAGC         |
| mMCSF         | GGTAGTGGTGGATGTTCCCA       | CCAGGATGAGGACAGACAGG       |
| mMIF1a        | TGACTTTTAGCGGCACGAAC       | GACTCAAGCGAAGGTGGAAC       |
| mMIP1a(CCL3)  | GTGGAATCTTCCGGCTGTAG       | ACCATGACACTCTGCAACCA       |
| mMIP1b(CCL4)  | AGAAACAGCAGGAAGTGGGA       | GCTCTGTGCAAACCTAACCC       |
| mCXCL14       | TTTGGTGTCTGCAGCTTAG        | AGCCAAAGTACCCACACTGC       |
| mRantes(CCL5) | CCACTTCTCTCTGGGTTGG        | GTGCCCACGTCAAGGAGTAT       |
| miNOS         | CAGAAGCAGAATGTGACC         | GTAGTAGTAGAATGGAGATAGG     |
| mCOX2         | TCTCCCCTCTCTACGCATTCTA     | ACGGATTGGAAGTTCTATTGGC     |
| mMCP1         | CGGAACCAAATGAGATCAGAACCTAC | GCTTCAGATTTACGGGTCAACTTCAC |
| mIFNg         | TGTCTTTCTGTCTTCAGAAA       | TTTCTGAAGACAAGAAAGACA      |
| mCD80         | ACCCCCAACATAACTGAGTCT      | TTCCAACCAAGAGAAGCGAGG      |
| mCD86         | TGTTTCCGTGGAGACGCAAG       | TTGAGCCTTTGTAAATGGGCA      |
| mCXCL11       | GGCTGCGACAAAAGTTGAAAGTA    | TCCTGGCACAGAGTCTTATTGGAG   |
| mCXCL9        | GGAGTTCGAGGAACCCTAGTG      | GGGATTTGTAGTGGATCGTGC      |
| mIL1a         | TGAGTTTTGGTGTCTTGGC        | TCGGGAGGAGACGACTCTAA       |
| mARG          | TGAGAGACCACGGGGACCTG       | GCACCACACTGACTTCCATTC      |
| mIL10         | CAGGACTTTAAGGGTTACTTGGGTTG | GCTCCACTGCCTTGCTCTTATTTTC  |
| mTGFB         | GTGTGGAGCAACATGTGGAACCTA   | TTGGTTTCAGCCACTGCCGTA      |
| mCD206        | TCTCCCGGAACCGACTCTTC       | GGTCGAGCACATAGGTCTTCT      |
| mCD163        | CCTCCTCATTGTCTTCTCCTGTG    | CATCCGCCTTTGAATCCATCTCTTG  |

# Statistical Modeling and Inference of M1/M2 Ratio using EM Algorithm

A normal mixture model is adopted to infer M1/M2 ratio in each sample. We assume that each sample is independent and contains genes from two groups: M1 and M2. For simplicity, we also assume that every gene across all samples shares the same distribution, the expression of which only affected by the M1/M2 state of the sample. Since the M1 and M2 state distribution of each gene is unknown, the problem of estimating the model parameters can be seen as a missing data problem. We therefore use EM algorithm to infer the missing data and model parameters in an iterative manner.

The qPCR detected gene expression levels for each sample  $i$  are denoted as  $\{g_1, \dots, g_n\}$ ,  $n$  is the total number of genes selected. We model the gene expression as a mixture of two normal models, denoted by  $M_k$ ,  $k = 1, 2$ . Let

$$\pi_k = P(g_j \in M_k), j = 1, \dots, n,$$

where  $\pi_k \in (0, 1)$  for  $k = 1, 2$ ,  $\sum_{k=1}^2 \pi_k = 1$  and  $g_j$  represents the expression level for gene  $j$ . Conditional on  $M_k$ , the gene expression level follows a normal distribution,  $g_j |_{g_j \in M_k} \sim N(\mu_{jk}, \sigma_{jk})$ .

EM algorithm can iteratively update model parameters from the data. The iteration comprises two steps: the Expectation step and the Maximization step. The E-step will calculate the membership value of  $M_k$  for each sample  $i$  as

$$\hat{p}_{k,i}^{(t)} = \frac{\hat{\pi}_k^{(t-1)} \prod_{j=1}^n f(g_{ij} | \hat{\mu}_{kj}^{(t-1)}, \hat{\sigma}_{kj}^{(t-1)})}{\sum_{l=1}^2 \hat{\pi}_l^{(t-1)} \prod_{j=1}^n f(g_{ij} | \hat{\mu}_{lj}^{(t-1)}, \hat{\sigma}_{lj}^{(t-1)})},$$

which can be seen as the probability of sample  $i$  being in the  $M_k$  model. The M-step will update  $\hat{\pi}_k^{(t)}$ ,  $\hat{\mu}_{kj}^{(t)}$ , and  $\hat{\sigma}_{kj}^{(t)}$  respectively based on the expected membership values calculated in the E-step ( $N$  is the total number of samples):

$$\hat{\pi}_k^{(t)} = \frac{\sum_{i=1}^N \hat{p}_{k,i}^{(t)}}{N}, k = 1, 2.$$

$$\hat{\mu}_{kj}^{(t)} = \frac{\sum_{i=1}^N \hat{p}_{ki}^{(t)} g_{ij}}{\sum_{i=1}^N \hat{p}_{ki}^{(t)}}, k = 1, 2.$$

$$\hat{\sigma}_{kj}^{(t)} = \frac{\sum_{i=1}^N \hat{p}_{ki}^{(t)} (g_{ij} - \hat{\mu}_{kj}^{(t)})^2}{\sum_{i=1}^N \hat{p}_{k,i}^{(t)}}, k = 1, 2.$$

To start the algorithm, initial values are set incorporating known attributes of selected genes' expression tendency under M1 and M2 state:

$$\hat{\mu}_{1,j}^{(0)} = \begin{cases} \frac{\sum_{i=1}^N g_{ij}}{N} + 1, & \text{if gene } j \text{ is M1 marker gene} \\ \frac{\sum_{i=1}^N g_{ij}}{N} - 1, & \text{if gene } j \text{ is M2 marker gene} \end{cases}$$

$$\hat{\mu}_{2,j}^{(0)} = \begin{cases} \frac{\sum_{i=1}^N g_{ij}}{N} - 1, & \text{if gene } j \text{ is M1 marker gene} \\ \frac{\sum_{i=1}^N g_{ij}}{N} + 1, & \text{if gene } j \text{ is M2 marker gene} \end{cases}$$

$$\hat{\sigma}_{kj}^{(0)} = \frac{\sum_{i=1}^N (g_{ij} - \mu)^2}{N}, \mu = \frac{\sum_{i=1}^N g_{ij}}{N}.$$

$$\hat{\pi}_1^{(0)} = 0.8, \hat{\pi}_2^{(0)} = 0.2.$$

E-step and M-step are repeated until no significant changes occur in the mean square difference of estimated parameters, this is, stop the  $t$ th iteration if

$$\frac{\sum_k \sum_j (\hat{\mu}_{kj}^{(t)} - \hat{\mu}_{kj}^{(t-1)})^2 + \sum_k \sum_j (\hat{\sigma}_{kj}^{(t)} - \hat{\sigma}_{kj}^{(t-1)})^2 + \sum_k (\hat{\pi}_k^{(t)} - \hat{\pi}_k^{(t-1)})^2}{4n + 2} < \delta,$$

where  $\delta$  is a sufficiently small number.

For each sample  $i$ , the probability of being in state M1 is therefore inferred from the algorithm as  $\hat{p}_{1,i}^{(t)}$ . The overall probability of samples under certain treatment being in state M1 is calculated as the average of  $\hat{p}_{1,i}^{(t)}$  for all the samples under that treatment.

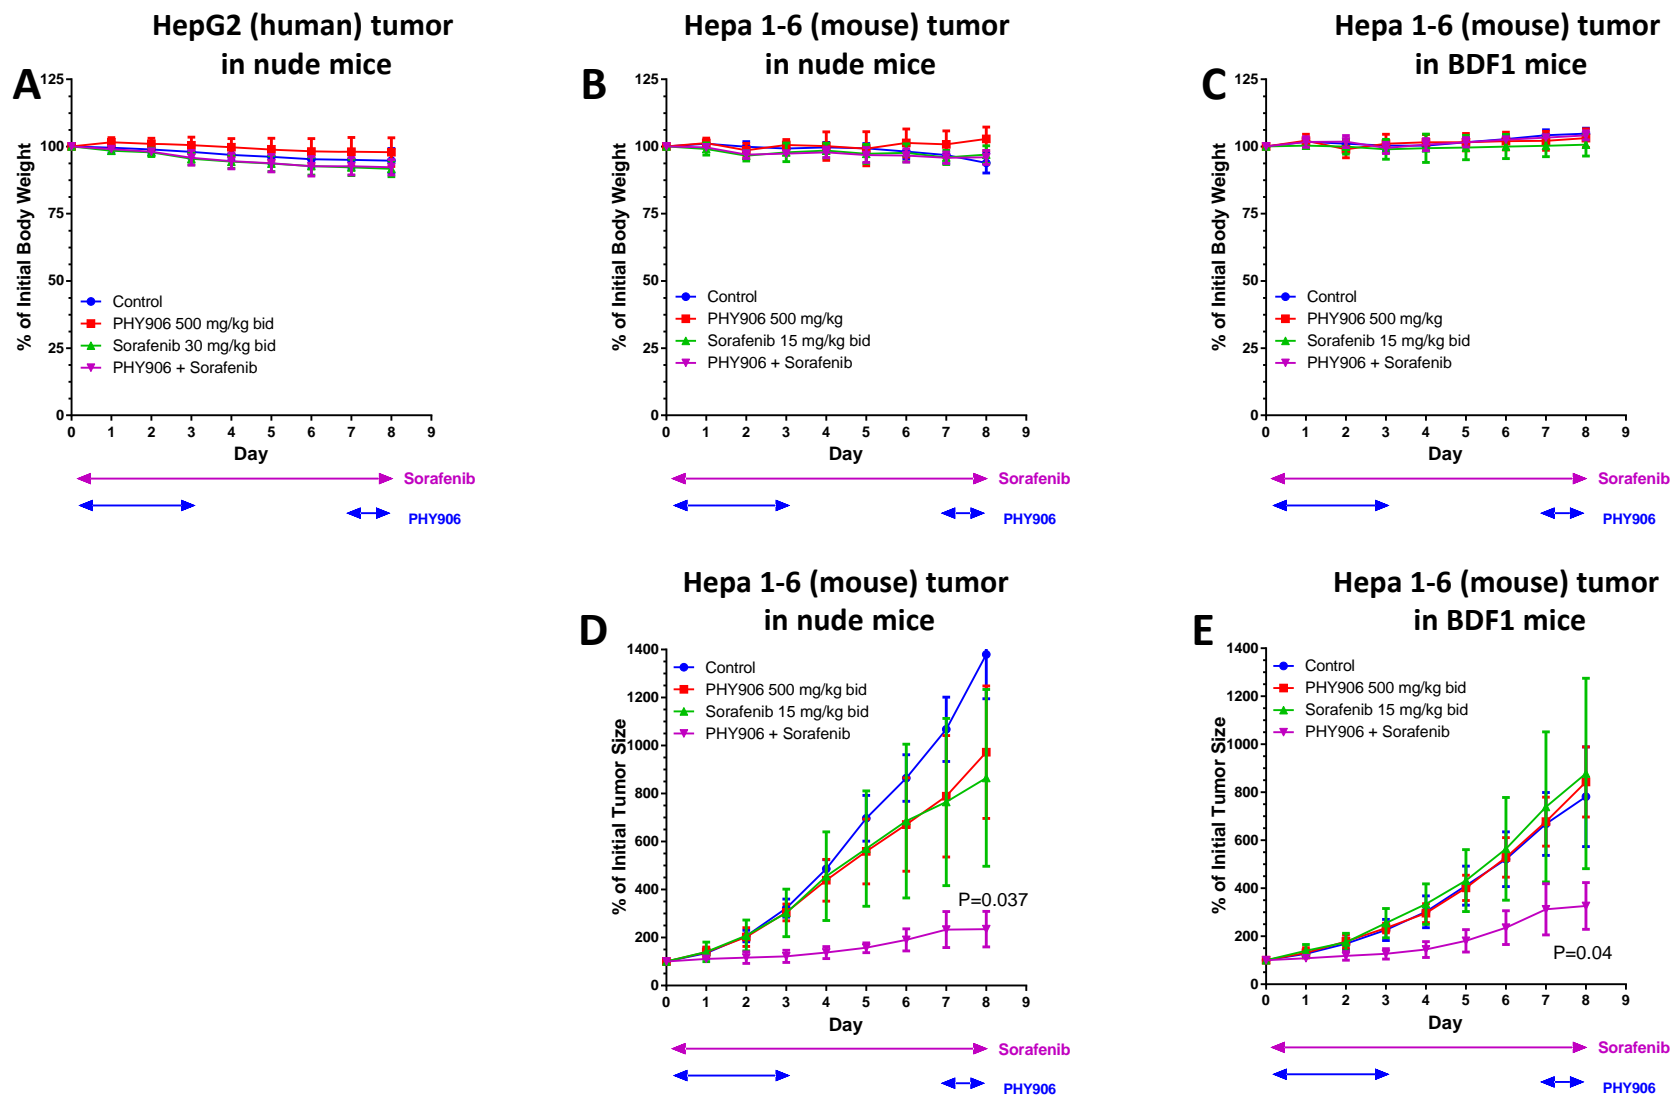

**Supplementary Figure 1.** Effect of PHY906 and Sorafenib on the body weight of HepG2 tumor bearing NCR nude mice (A), Hepa1-6 tumor bearing NCR nude mice (B), Hepa1-6 tumor bearing BDF-1 mice (C) and Hepa 1-6 tumor growth in NCR nude mice (D) and BDF1 mice (E). Sorafenib (30mg/kg or 15mg/kg as indicated in the graphs, b.i.d) was administered orally daily and PHY906 (500mg/kg, b.i.d.) was administered orally from day 0 to day 3 and from day 7 to day 8. Error bars indicate standard deviations and N=14. Details of experimental procedures are given in Materials and Methods

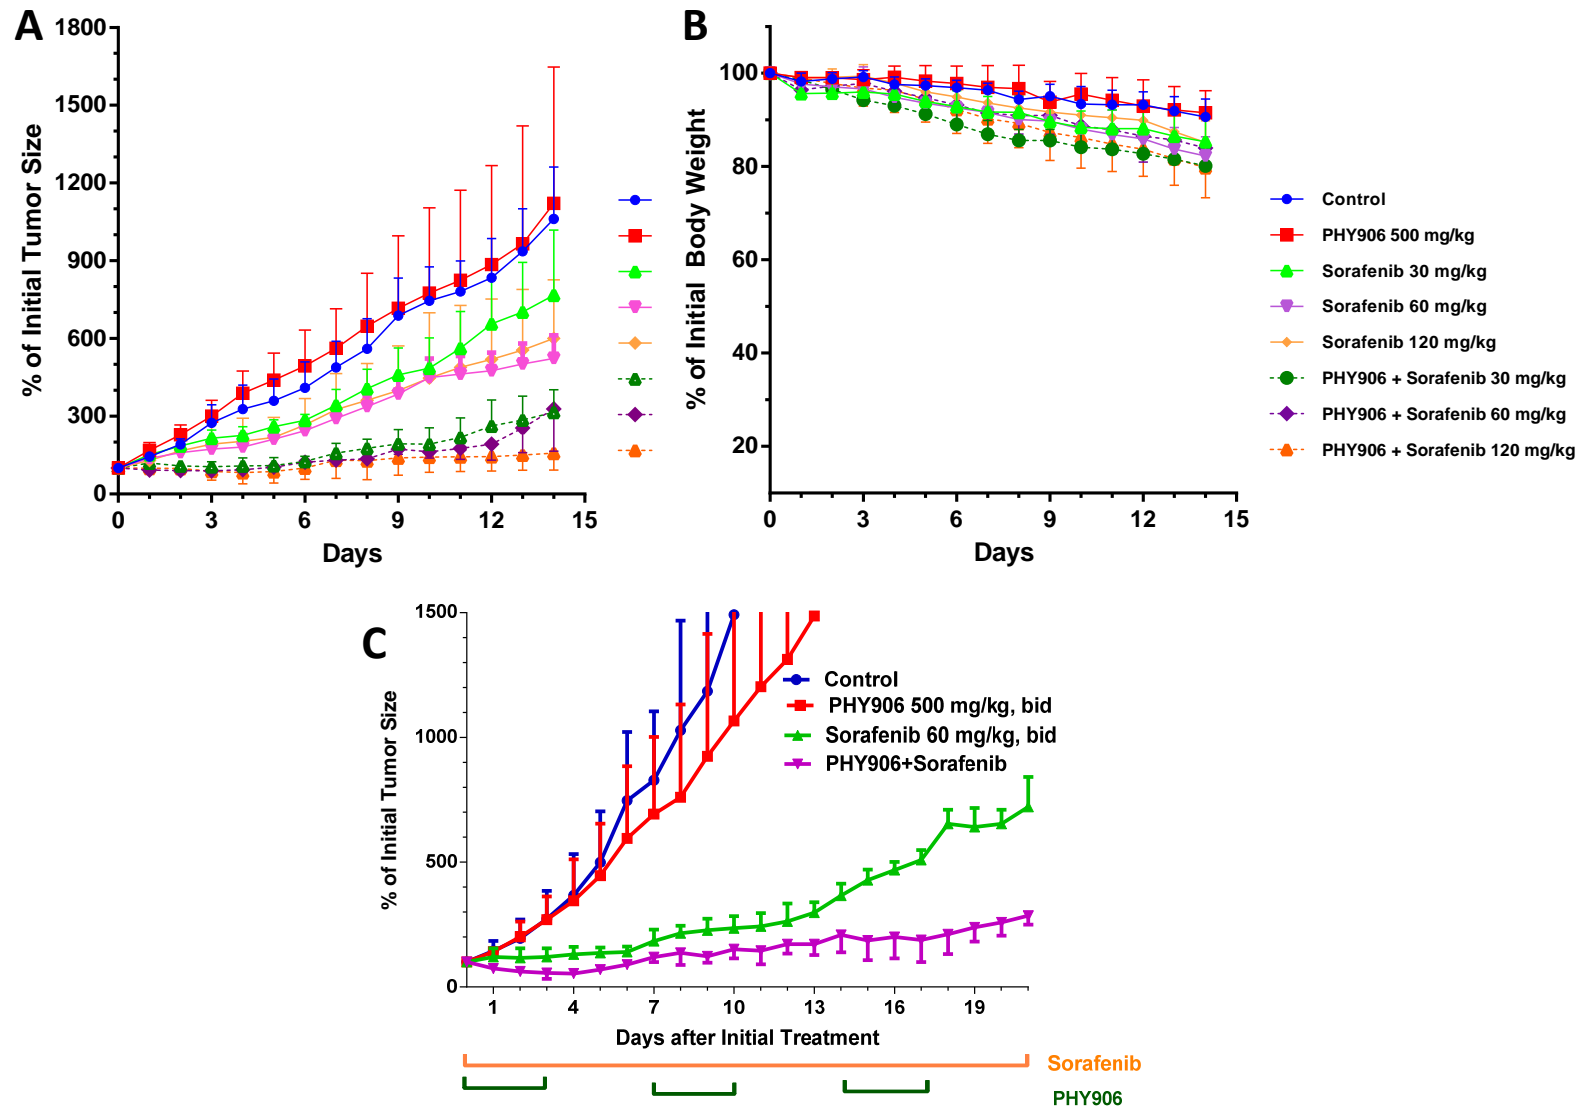

**Supplementary Figure 2.** Effect of PHY906 and different dosage of sorafenib on the HepG2 tumor growth (A) and body weight in NCR nude mice (B). Sorafenib (30mg/kg, 60mg/kg or 120mg/kg as indicated in the graphs, b.i.d.) was administered orally daily and PHY906 (500mg/kg b.i.d.) was administered orally from day 0 to day 3 and from day 7 to day 10 for two treatment cycles. (C) Effect of PHY906 and Sorafenib on the HepG2 tumor growth by three-cycle treatment. Error bars indicate standard deviations and N=5. Details of experimental procedures are given in Materials and Methods

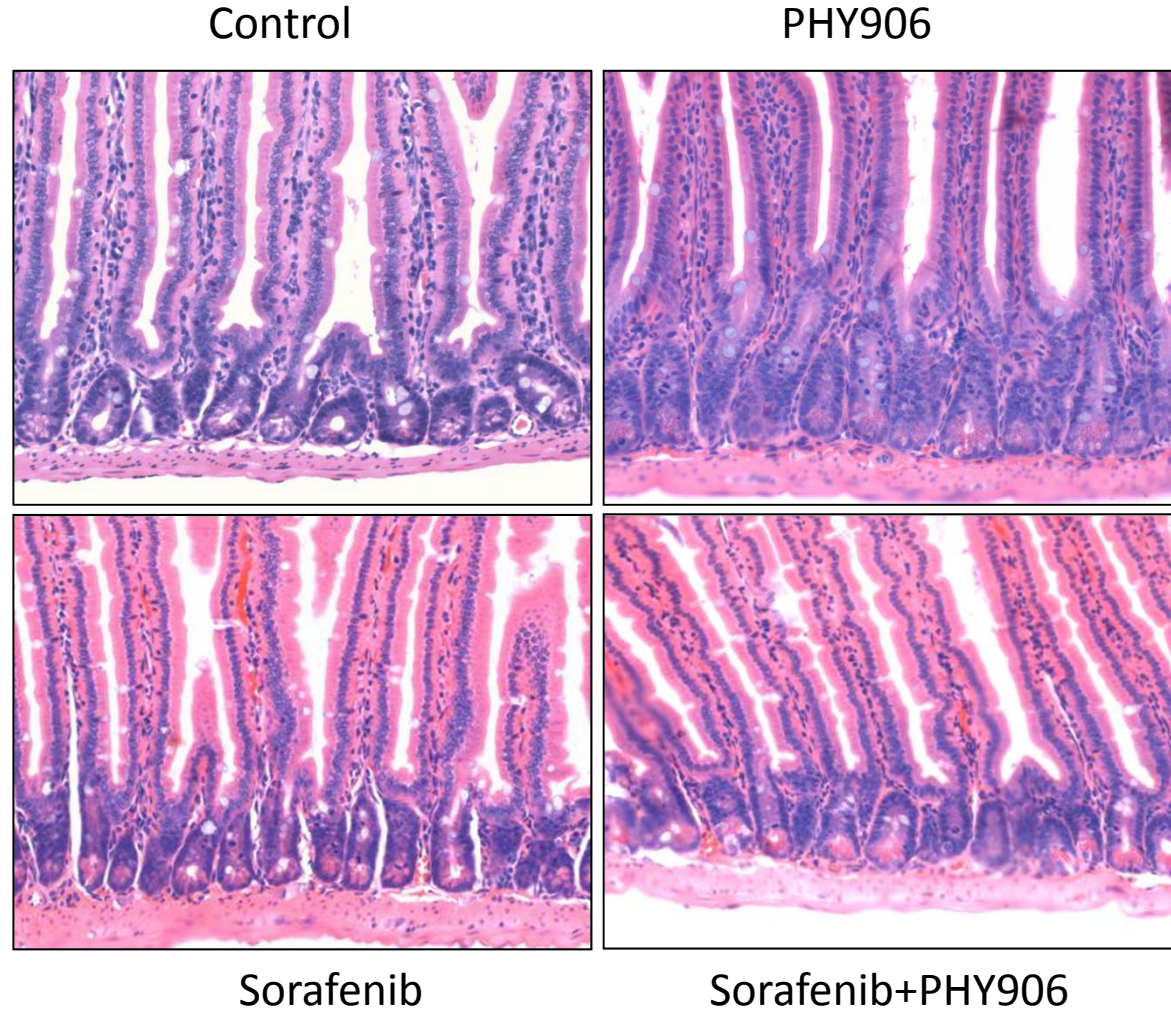

**Supplementary Figure 3.** Hematoxylin and eosin staining of middle jejunum sections from sample collected at day 9 after drug treatments as indicated on the above. Sorafenib (30mg/kg, b.i.d) was administered orally daily and PHY906 (500mg/kg, b.i.d.) was administered orally from day 0 to day 3 and from day 7 to day 8. Details of experimental procedures are given in Materials and Methods.



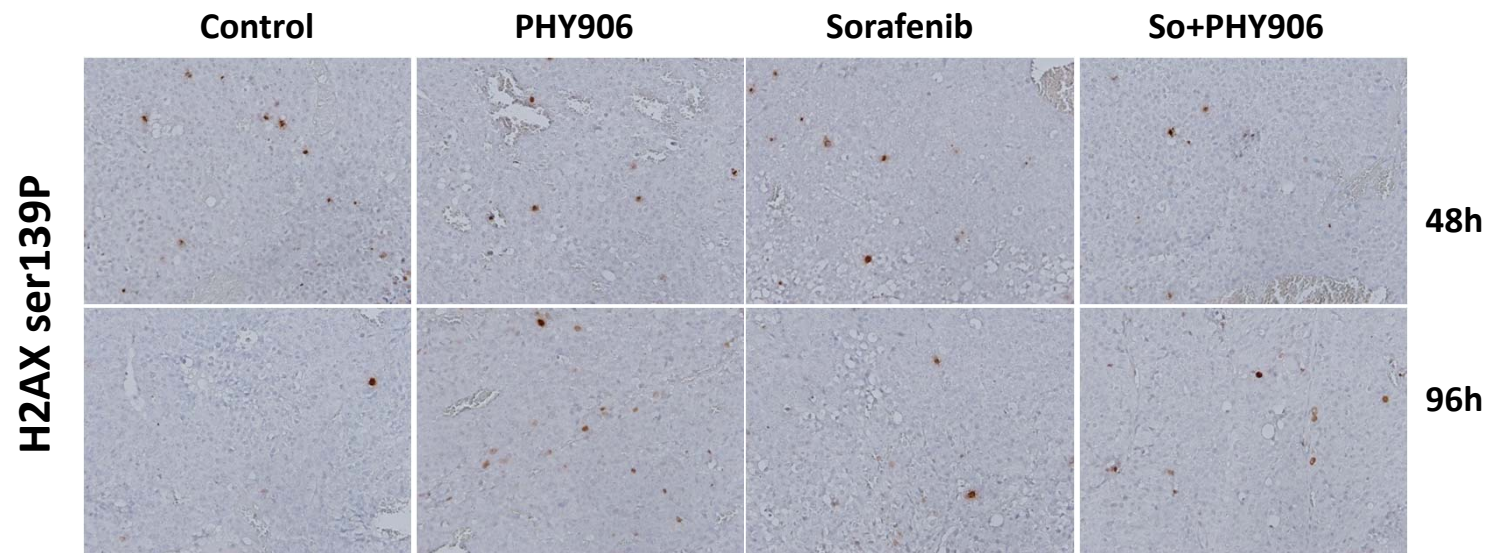

**Supplementary Figure 5.** Immunohistochemistry of H2AX ser139P of HepG2 tumor section tumor after the drug treatment for 48h and 96h. Sorafenib (30mg/kg, b.i.d) was administered orally daily and/or PHY906 (500mg/kg, b.i.d.) was administered orally. Details of experimental procedures are given in Materials and Methods.

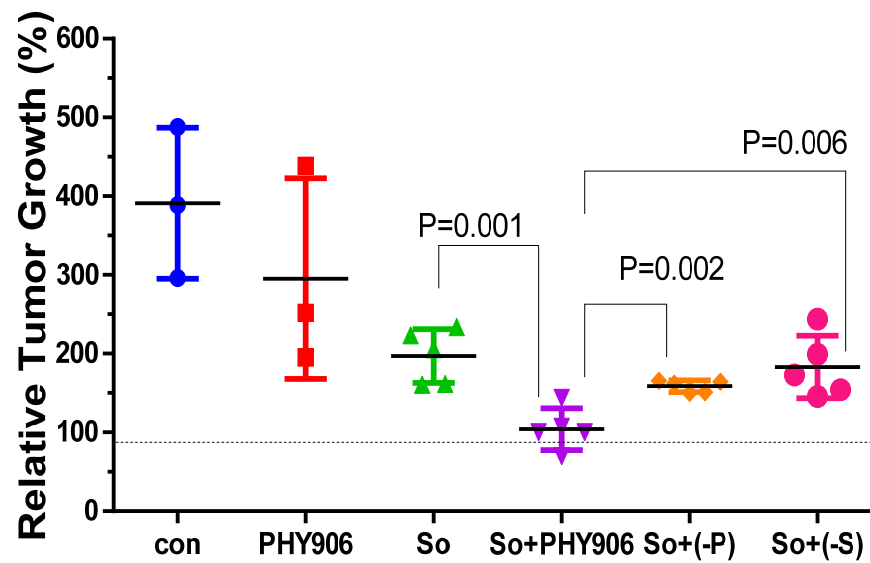

**Supplementary Figure 5.** Effect of PHY906, Sorafenib (So), (So+PHY906), (So+(-P)) and (So+(-S)) on HepG2 tumor growth at 96h. Number of animals is 5. Sorafenib (30mg/kg, b.i.d.) and/or PHY906, (-P), (-S) (500mg/kg, b.i.d.) were administered orally twice a day. Details of experimental procedures are given in Materials and Methods.

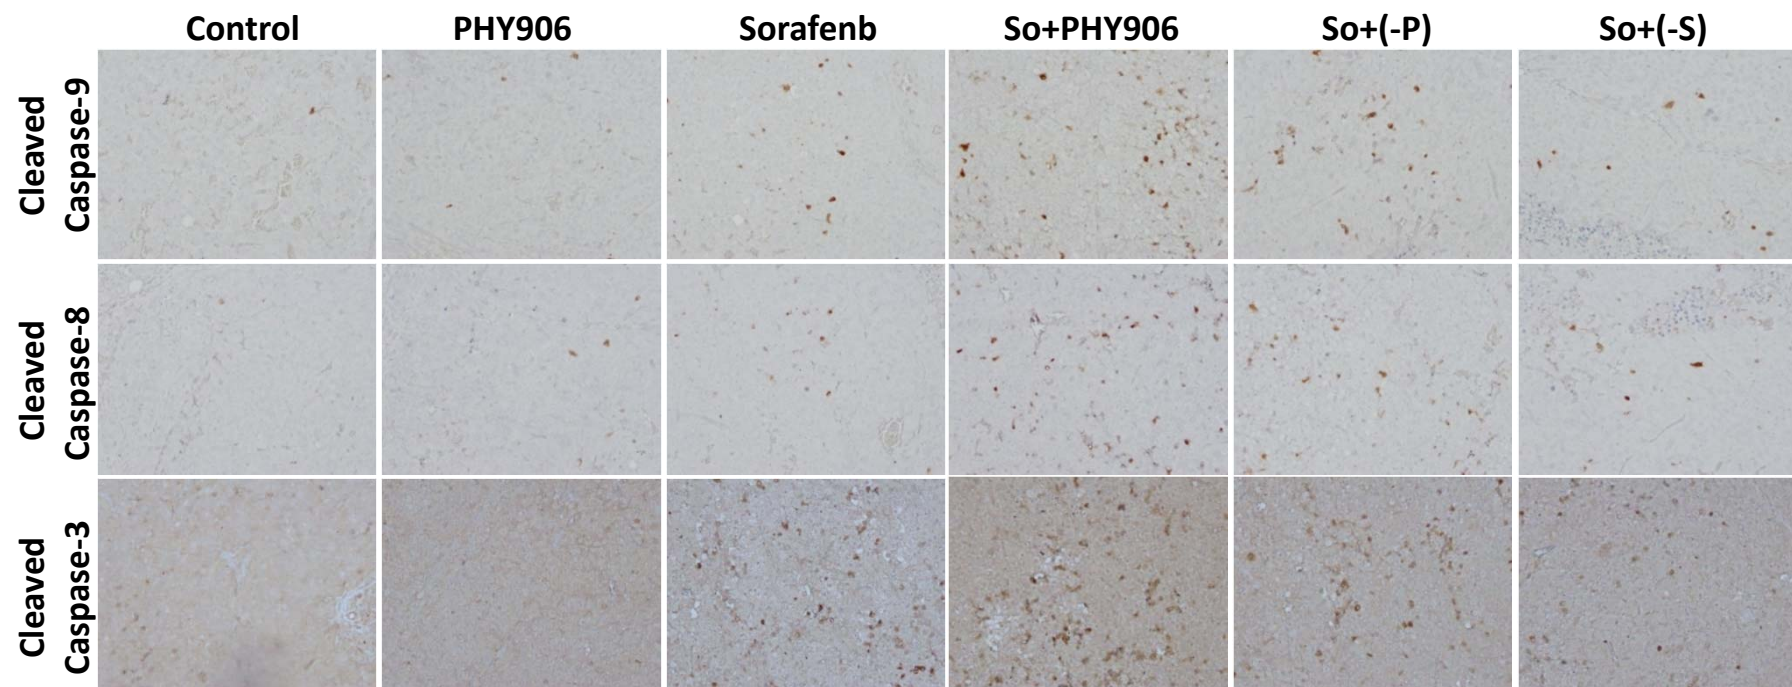

**Supplementary Figure 6.** Effect of PHY906, Sorafenib (So), Sorafenib+PHY906 (So+PHY906), Sorafenib+PHY906 deleted P (So+(-P)) and Sorafenib+PHY906 deleted S (So+(-S)) on the induction of apoptosis of HepG2 tumor in NCR nude mouse. Immunohistochemistry staining for cleaved caspase-3, cleaved caspase-8, cleaved caspase-9 of HepG2 tumor section after the treatments for 96h. Details of experimental procedures are given in Materials and Methods.

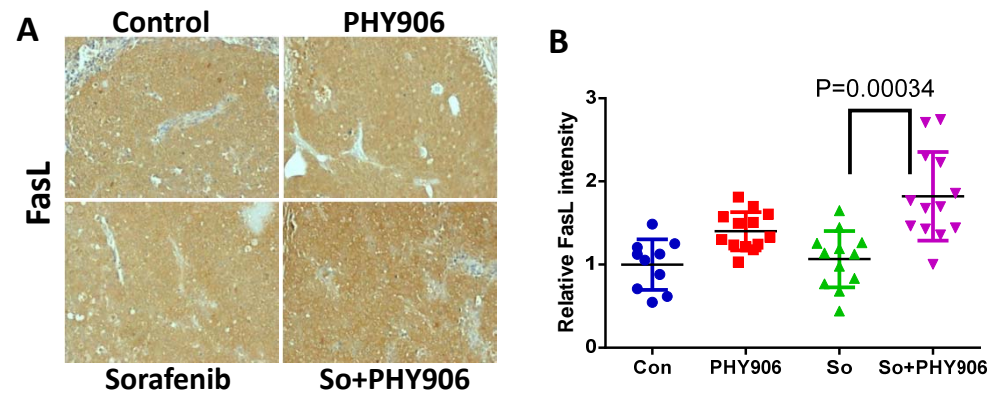

**Supplementary Figure 7.** Effect of PHY906 and/or Sorafenib (So) on the expression of death receptors and their ligands level HepG2 tumor in NCR nude mouse. **(A)** Immunohistochemistry staining for FasL protein of HepG2 tumor section after the drug treatment for 96h. **(B)** Quantification of immunohistochemistry staining of FasL using imaging software. (Each spot represent a mean of the intensity of FasL staining from 5 views of a tumor section and number of animals for 96h treatment group is 14). Sorafenib (30mg/kg, b.i.d) was administered orally daily and/or PHY906 (500mg/kg, b.i.d.) was administered orally. Details of experimental procedures are given in Materials and Methods.

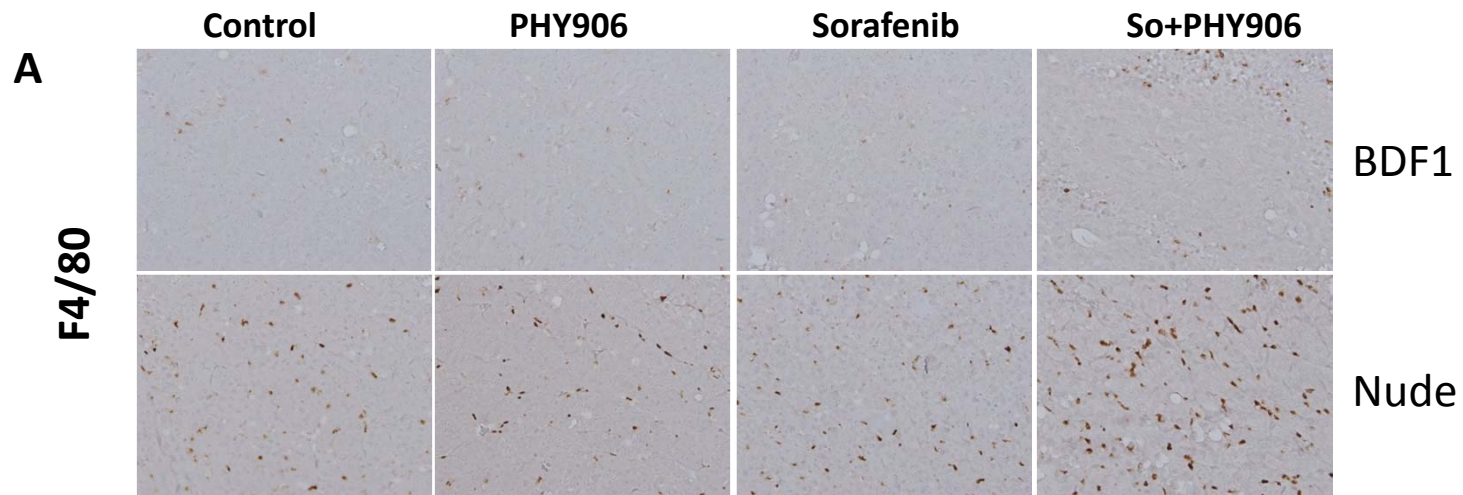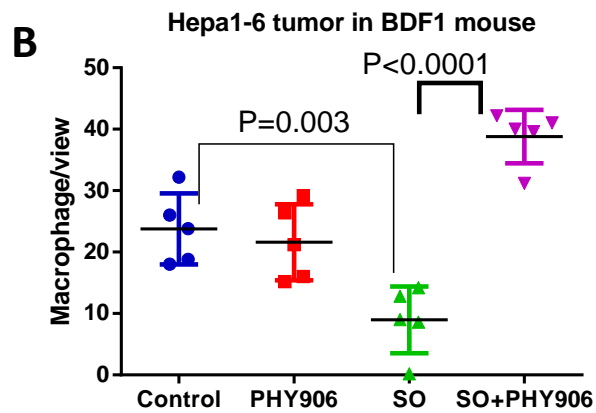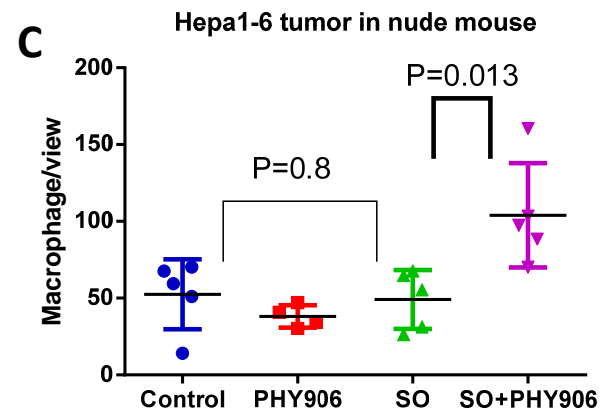

**Supplementary Figure 8.** Effect of PHY906 and/or Sorafenib (So) on the infiltration of macrophage of Hepa 1-6 tumor in BDF1 and NCR nude mouse. **(A)** Immunohistochemistry staining of F4/80 for macrophages of Hepa 1-6 tumor section in BDF1 mice and nude mice after 9-day treatment. The number of macrophage per each view of Hepa 1-6 tumor section in **(B)** BDF1 mice and **(c)** nude mice after 9-day treatment. Each spot represent a mean of the number of F4/80 stained cells from 4 to 5 views of each tumor section. Sorafenib (15mg/kg, b.i.d) was administered orally daily and/or PHY906 (500mg/kg, b.i.d.) was administered orally. Details of experimental procedures are given in Materials and Methods.

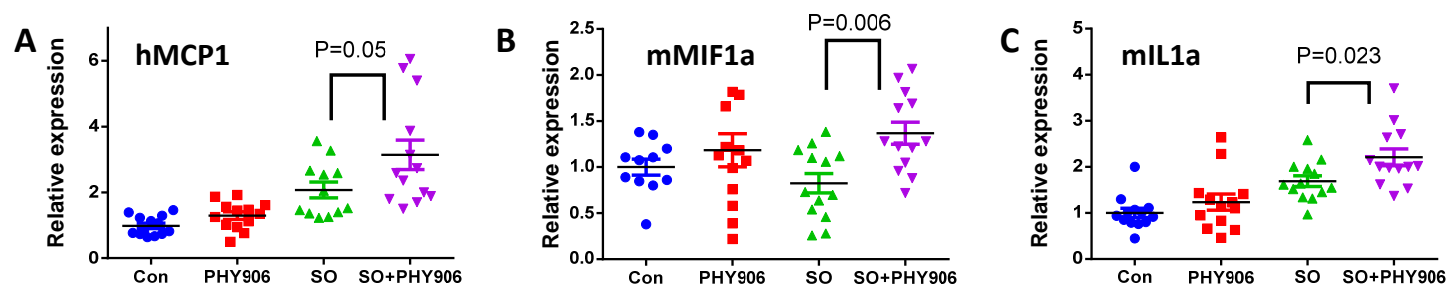

**Supplementary Figure 9.** The mRNA expression of human hMCP1(A) , mMIF1a (B) and mL1a (C) of HepG2 tumor after the treatment of PHY906 and/or Sorafenib (So) for 96h. Each spot represent a mean of two to three different quantitative real-time PCR experiments. (triplicate samples of each; Number of animals for 96h treatment group is 14). Sorafenib (30mg/kg, b.i.d) and/or PHY906 (500mg/kg, b.i.d.) was administered orally. Details of experimental procedures are given in Materials and Methods.

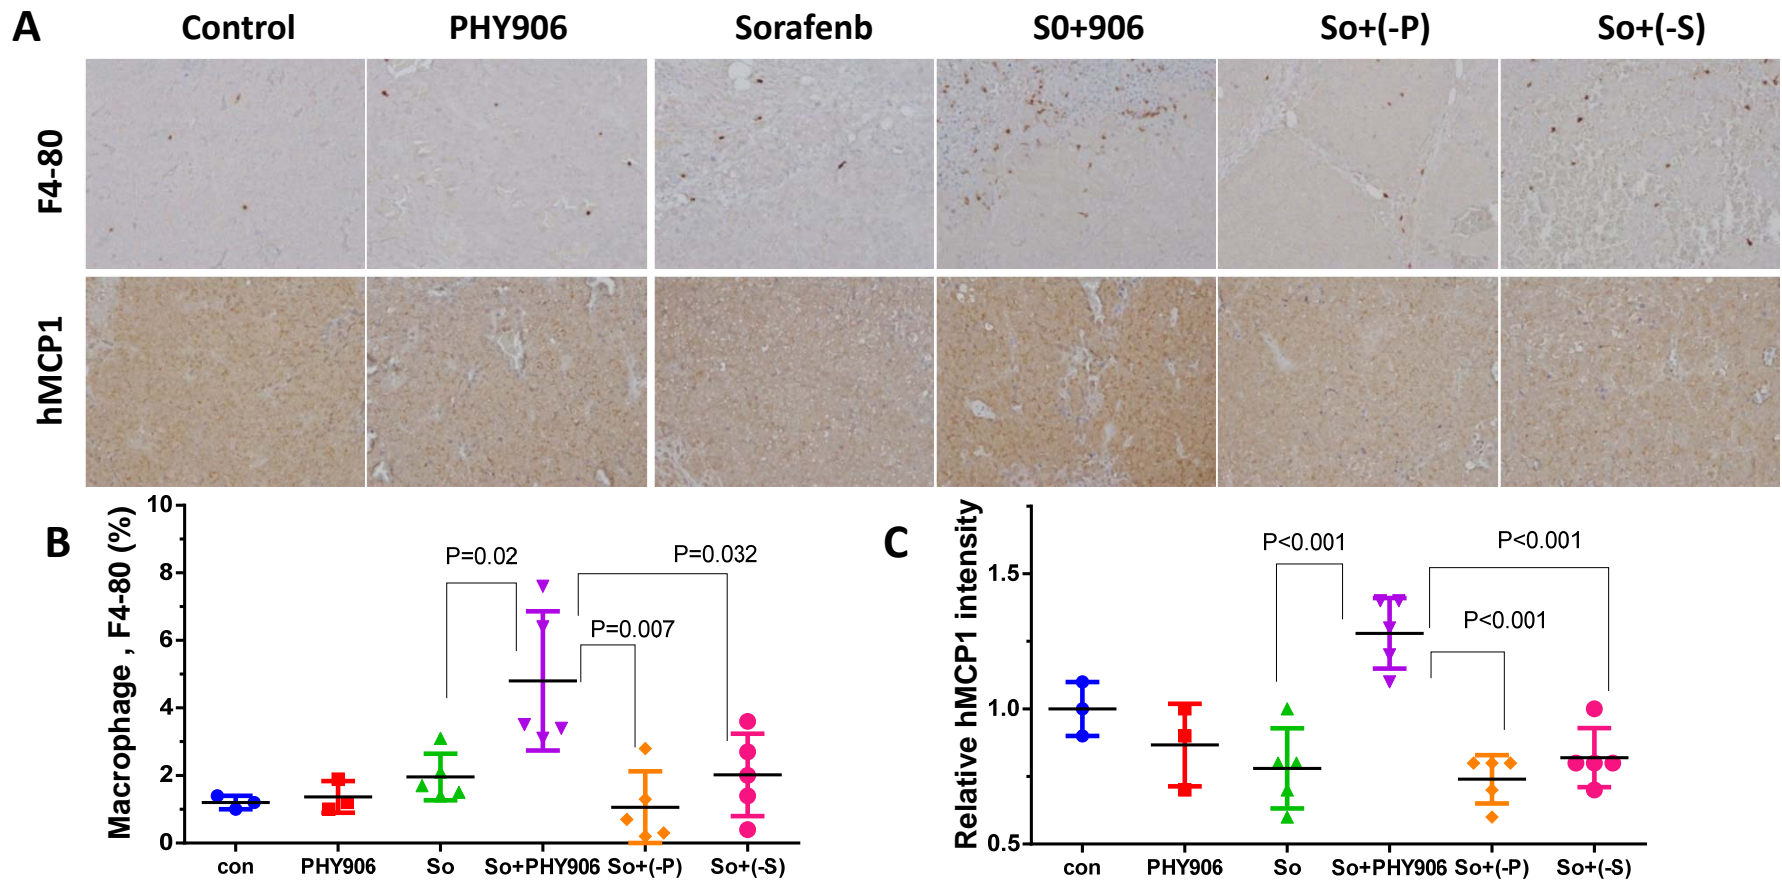

**Supplementary Figure 10.** Effect of PHY906, Sorafenib (So), Sorafenib+PHY906 (So+PHY906), Sorafenib+PHY906 deleted P (So+(-P)) and Sorafenib+PHY906 deleted S (So+(-S)) on the infiltration of macrophage (F4-80) and hMCP1 of HepG2 tumor in NCR nude mouse at 96h. **(A)** Immunohistochemistry of hMCP1 of HepG2 tumor section tumor after PHY906 and/or Sorafenib (So) treatment for 96h. **(B)** Percentage of F4/80 stained cell per view of HepG2 tumor section after the treatment of PHY906, Sorafenib (So), Sorafenib+PHY906 (So+PHY906), Sorafenib+PHY906 deleted P (So+(-P)) and Sorafenib+PHY906 deleted S (So+(-S)) for 96h. **(C)** Quantification of immunohistochemistry staining of hMCP1 of HepG2 tumor section after treatment with PHY906, Sorafenib (So), Sorafenib+PHY906 (So+PHY906), Sorafenib+PHY906 deleted P (So+(-P)), and Sorafenib+PHY906 deleted S (So+(-S)) for 96h. Sorafenib (30mg/kg, b.i.d.) and/or PHY906, (-P), (-S) (500mg/kg, b.i.d.) was administered orally twice daily. Details of experimental procedures are given in Materials and Methods.

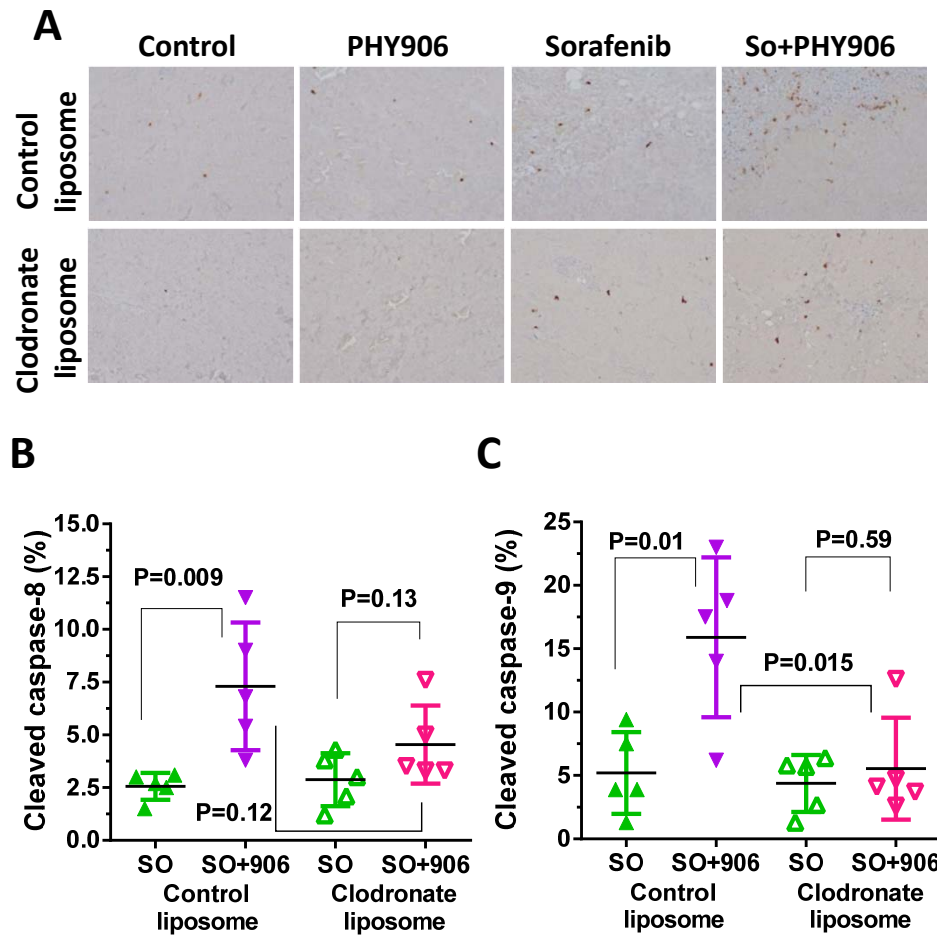

**Supplementary Figure 11.** Effect of clodronate liposome treatment on macrophage infiltration and apoptosis of different treatment conditions. **(A)** Immunohistochemistry of hMCP1 of HepG2 tumor section tumor after PHY906 and/or Sorafenib (So) treatment with control liposome or clodronate liposome for 96h. **(B, C)** Quantitation of immunohistochemistry staining for cleaved caspase-8, cleaved caspase-9 of HepG2 tumor sections following treatment of Sorafenib (So) or So+PHY906 for 96h. Liposomes were given using i.p. injection at day -2(0.4ml/mouse), day 0 and day 2 (0.2 ml/mouse) Each spot represents a mean of the number cleaved caspase-8 or cleaved caspase-9 stained cells from 4 to 5 views of each tumor section against total live cells (PCNA-stained) in each treatment group. Details of experimental procedures are given in Materials and Methods.



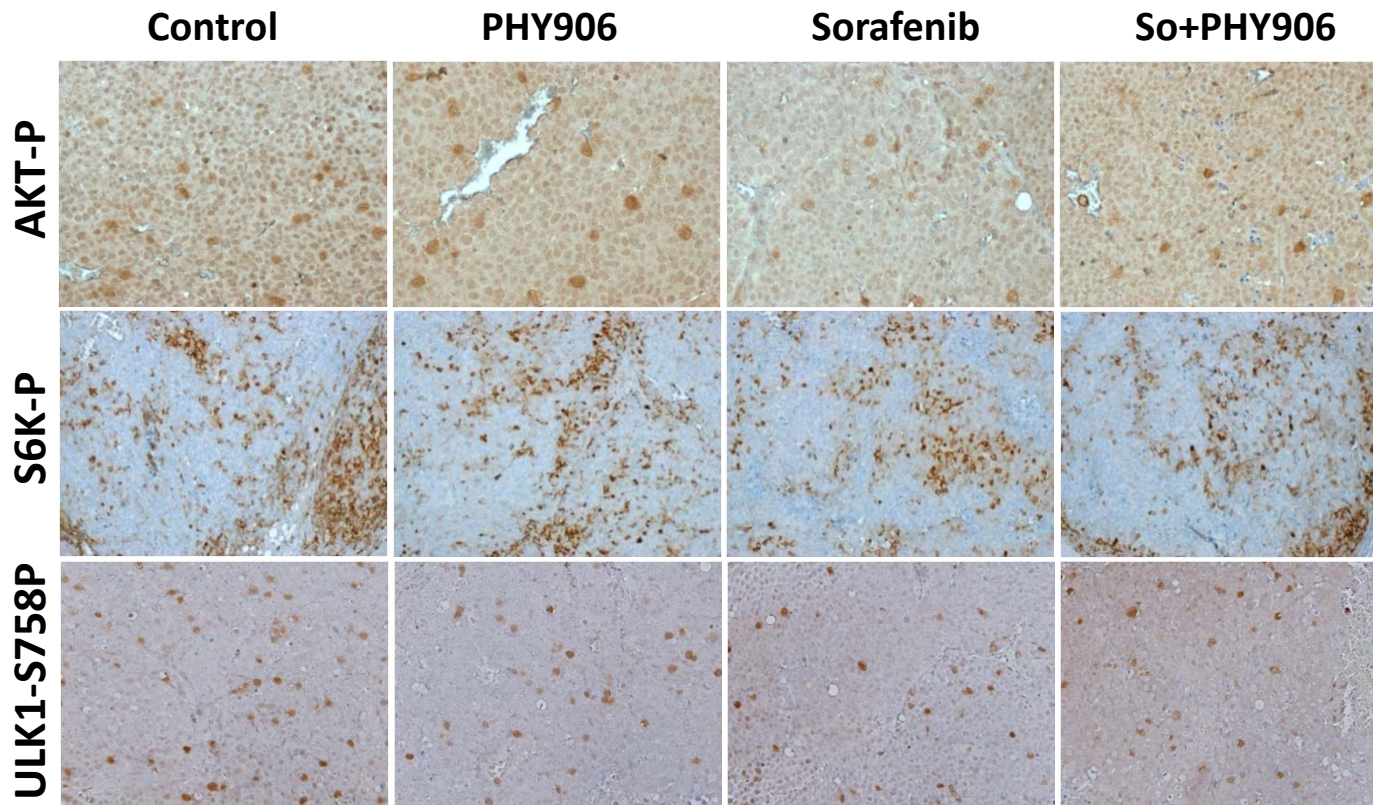

**Supplementary Figure 12.** Effect of PHY906 and/or Sorafenib (So) on the induction of autophagy of HepG2 tumor in NCR nude mouse. Immunohistochemistry staining for AKT-P, S6K-P and ULK1-S758P of HepG2 tumor section after the treatment of Sorafenib and Sorafenib plus PHY906 for 96h. Sorafenib (30mg/kg, b.i.d) and/or PHY906 (500mg/kg, b.i.d.) was administered orally. Details of experimental procedures are given in Materials and Methods.

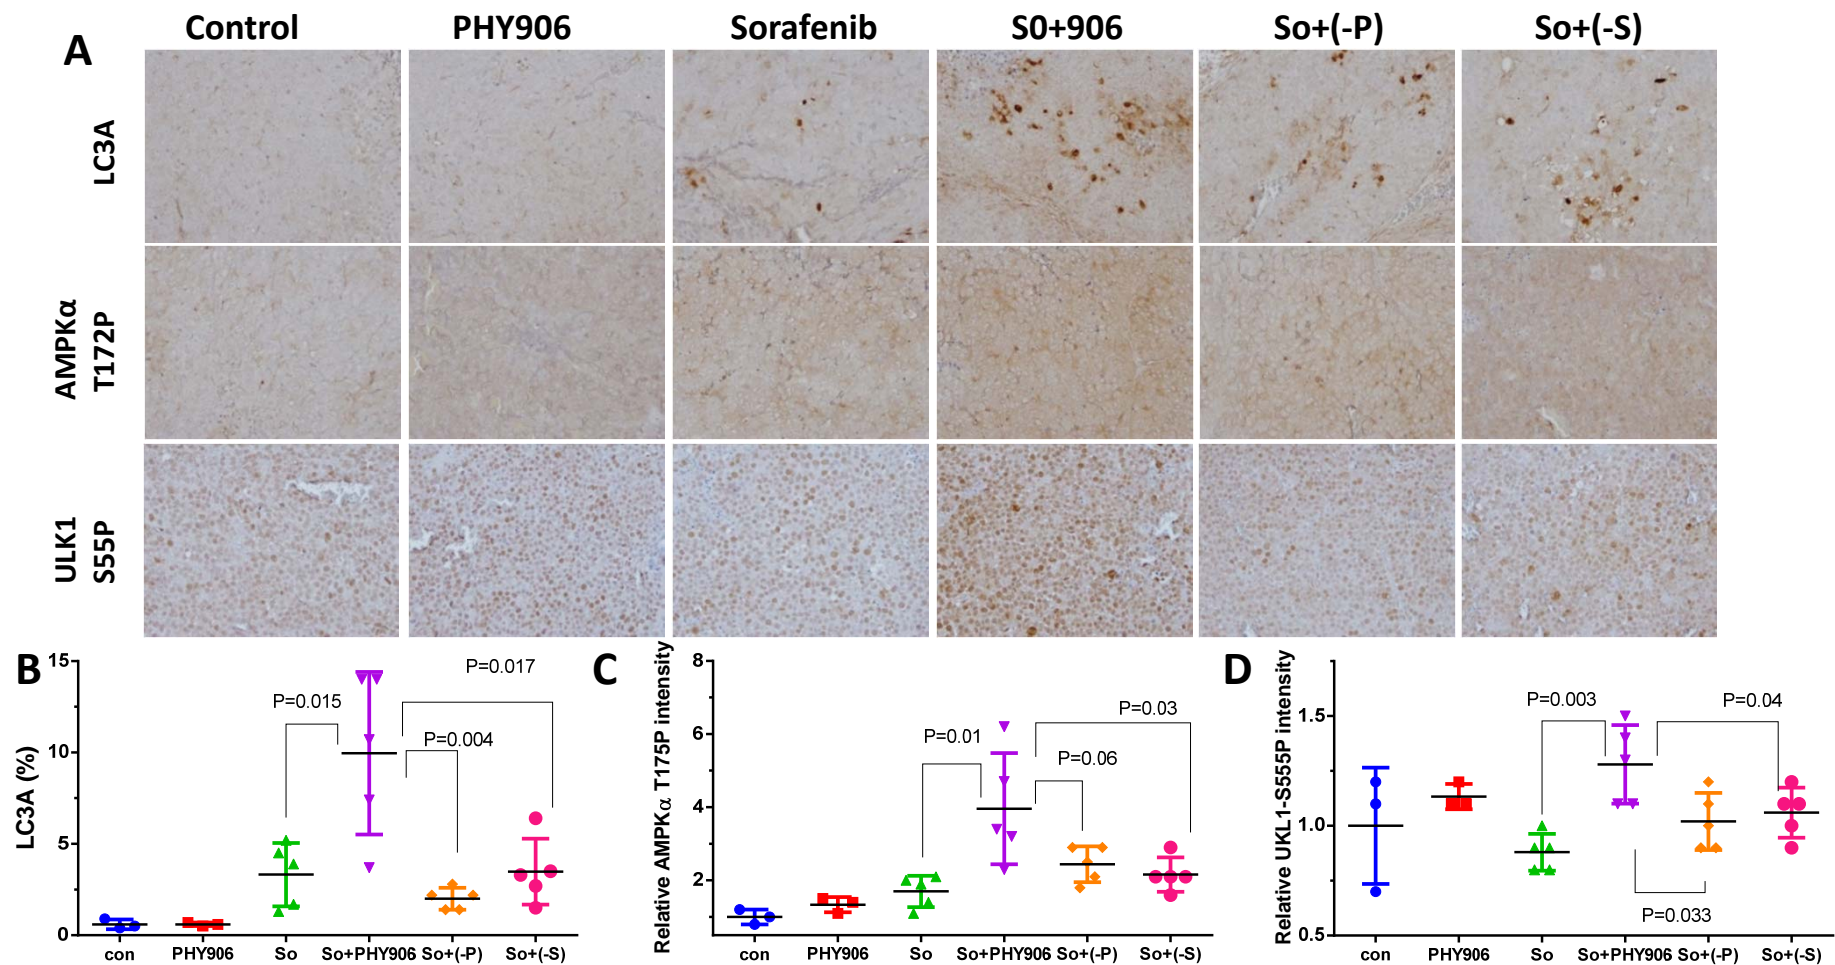

**Supplementary Figure 13.** Effect of PHY906, Sorafenib (So), Sorafenib+PHY906 (So+PHY906), Sorafenib+PHY906 deleted P (So+(-P)) and Sorafenib+PHY906 deleted S (So+(-S)) on LC3A, AMPK $\alpha$  T172P, ULK1 S555P of HepG2 tumor in NCR nude mouse at 96h. **(B)** LC3A stained cell per view of HepG2 tumor section after the treatment of PHY906, Sorafenib (So), Sorafenib+PHY906 (So+PHY906), Sorafenib+PHY906 deleted P (So+(-P)), and Sorafenib+PHY906 deleted S (So+(-S)) for 96h. Quantification of immunohistochemistry staining of **(C)** AMPK $\alpha$  T172P and **(D)** ULK1 S555P of HepG2 tumor section after the treatment of PHY906, Sorafenib (So), Sorafenib+PHY906 (So+PHY906), Sorafenib+PHY906 deleted P (So+(-P)), and Sorafenib+PHY906 deleted S (So+(-S)) for 96h. Sorafenib (30mg/kg b.i.d.) and/or PHY906, (-P), (-S) (500mg/kg b.i.d.) was administered orally. Details of experimental procedures are given in Materials and Methods.

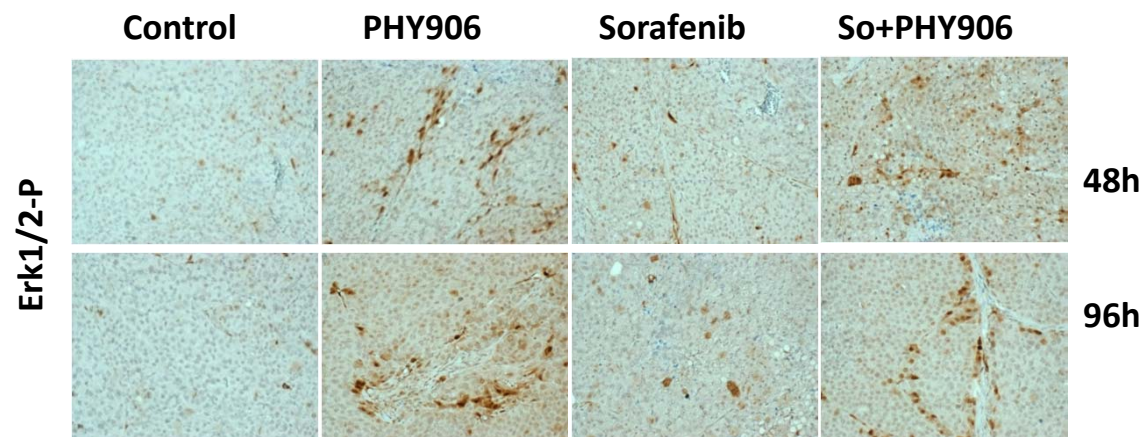

**Supplementary Figure 14.** Effect of PHY906 and/or Sorafenib (So) on Erk1/2 phosphorylation of HepG2 tumor in NCR nude mouse. Immunohistochemistry staining for the phosphorylated Erk1/2 (Thr202/Tyr204) of HepG2 tumor section after the drug treatment for 48h and 96h. Details of experimental procedures are given in Materials and Methods.

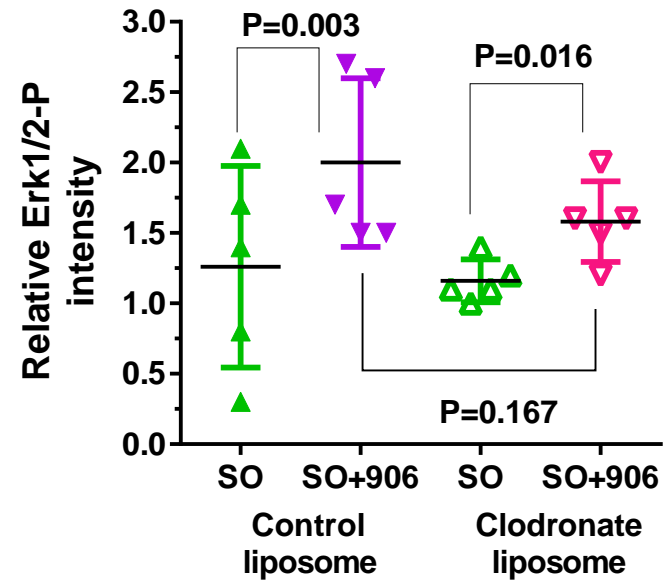

**Supplementary Figure 15.** Effect of clodronate liposome treatment on Erk1/2 autophagy phosphorylation of HepG2 tumor sections following treatment of Sorafenib (So) or So+PHY906 for 96h. Liposome were given using i.p. injection at day -2, day 0 and day 2. Each spot represents a mean of the number LC3A stained cells or the intensity of brown color from 4 to 5 views of each tumor section in each treatment group. Details of experimental procedures are given in Materials and Methods.

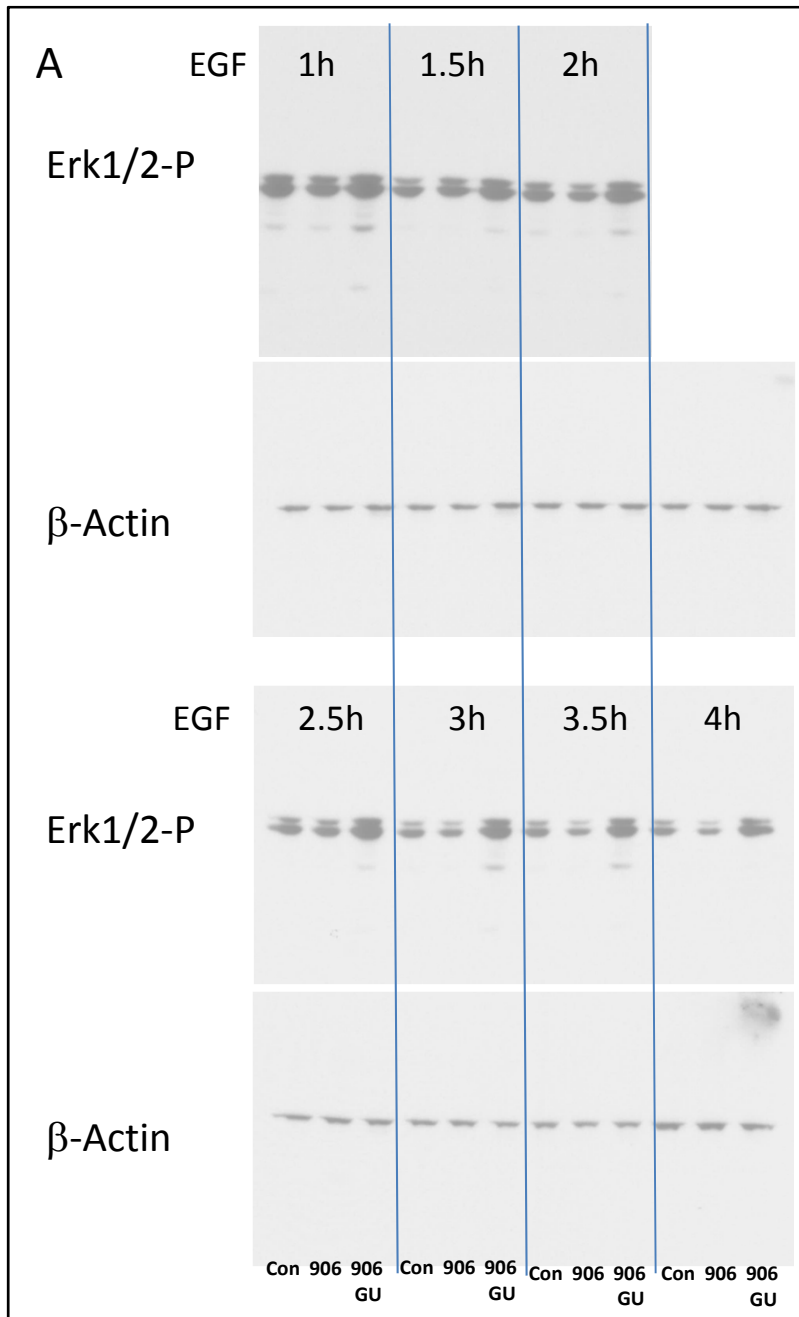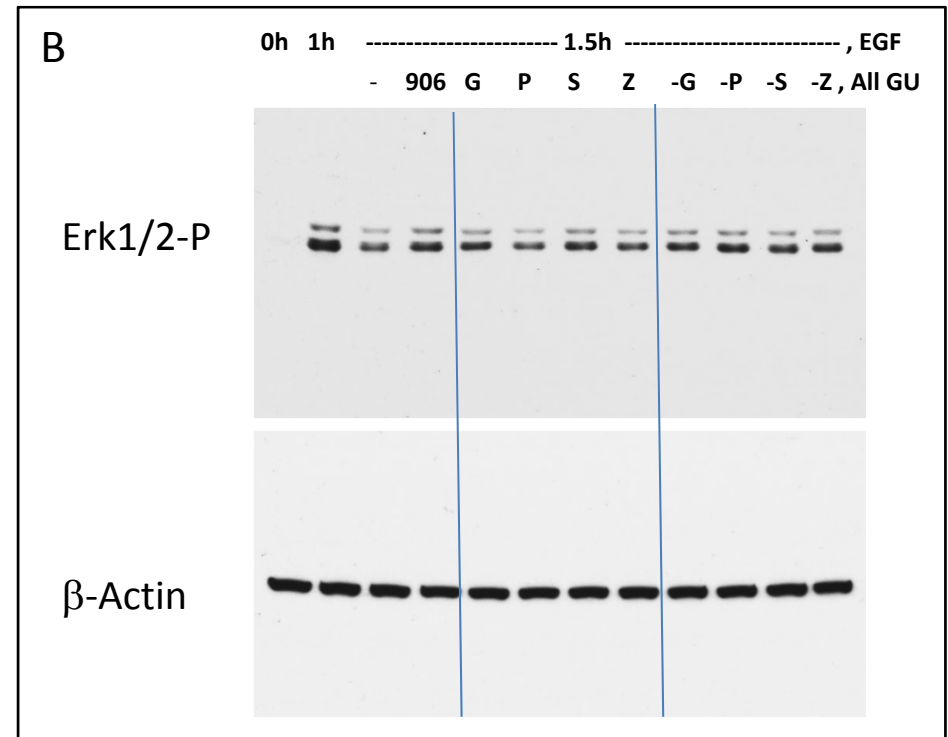

**Supplementary Figure 16.** Effect of PHY906 on dephosphorylation of Erk1/2. **A)** Western blotting analysis for the effect of PHY906 or *E.coli*  $\beta$ -glucuronidase treated PHY906 (500 $\mu$ g/ml) on dephosphorylation rate of Erk1/2 in HepG2 cells following stimulation with EGF (50ng/ml).  $\beta$ -actin was used as the loading control for normalization. **(B)** Western blotting analysis for the effect of *E.coli*  $\beta$ -glucuronidase treated PHY906 (500 $\mu$ g/ml), equivalent concentration of single herbs (G, P, S, Z), or equivalent concentration of a one herb deleted formula (-G, -P, -S, -Z) on dephosphorylation rate of Erk1/2 in HepG2 cells following stimulation with EGF (50ng/ml).

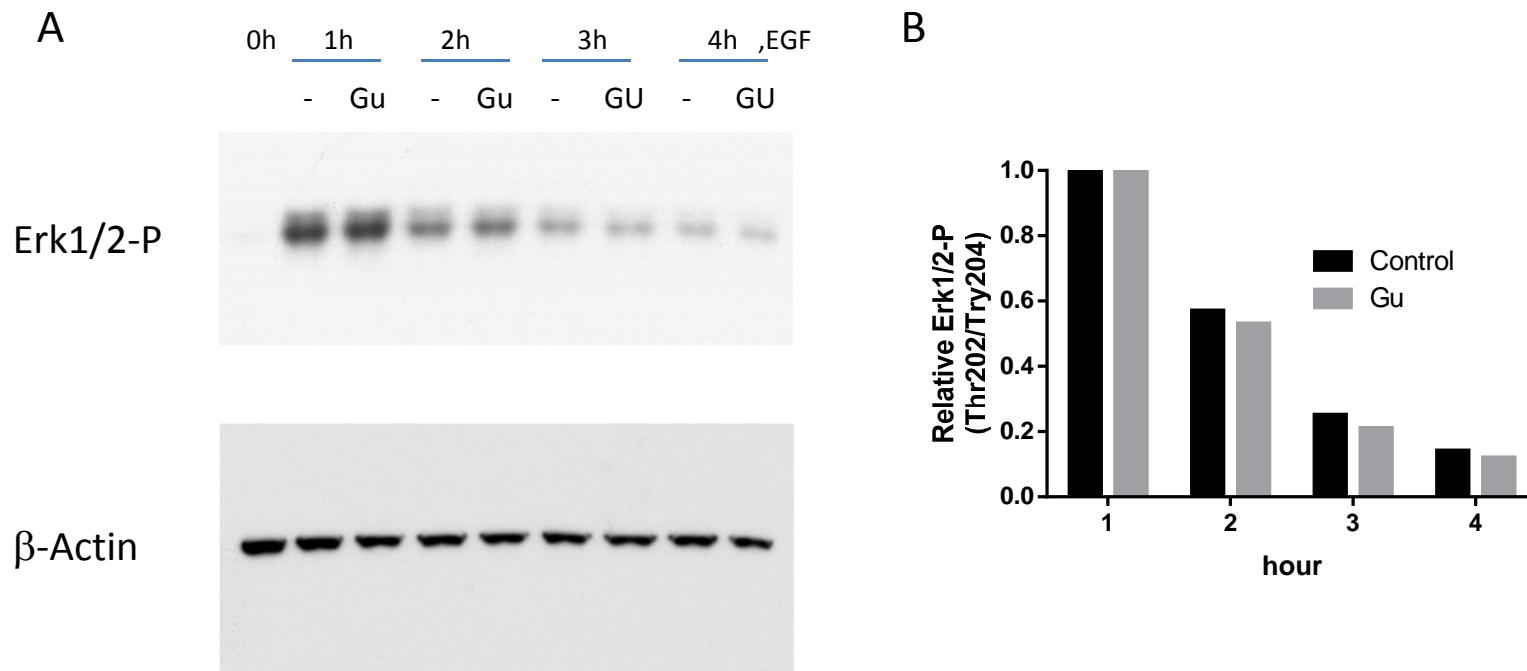

**Supplementary Figure 17.** Effect of *E. coli*  $\beta$ -glucuronidase (Gu) on dephosphorylation of ERK1/2. **A)** Western blotting analysis for the effect of PHY906 or *E. coli*  $\beta$ -glucuronidase treated PHY906 (500 $\mu$ g/ml) on dephosphorylation rate of Erk1/2 in HepG2 cells following stimulation with EGF (50ng/ml).  $\beta$ -actin was used as the loading control. **(B)** Quantification of the Western blot results for the phosphorylated Erk1/2 (Thr202/Tyr204). Details of experimental procedures are given in Materials and Methods.

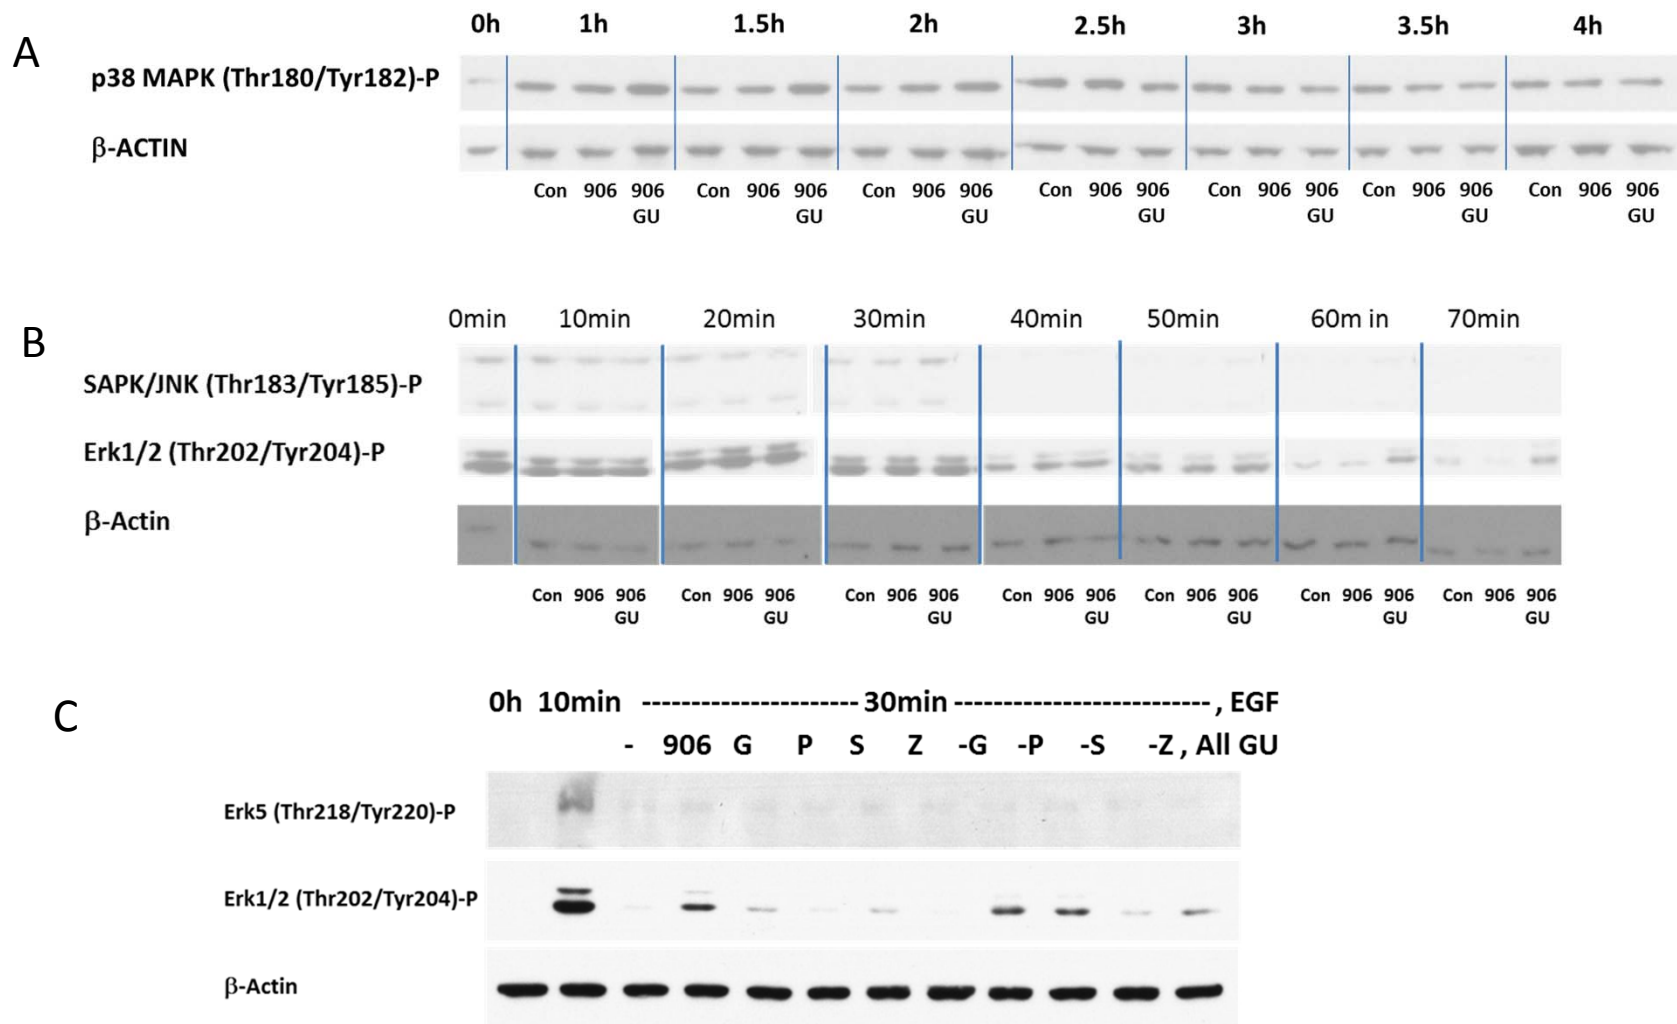

**Supplementary Figure 18.** Effect of PHY906 on p38 MARK, SAPK/JNK, ERK5, ERK1/2 phosphorylation of HepG2 cell in culture. **(A)** Western blotting analysis for the effect of PHY906 or *E.coli*  $\beta$ -glucuronidase treated PHY906 (500 $\mu$ g/ml) on dephosphorylation rate of p38 MARK (Thr180/Tyr182) in HepG2 cells after stimulated using EGF (50ng/ml) for 1h.  $\beta$ -actin was used as the loading control. **(B)** Western blotting analysis for the effect of PHY906 or *E.coli*  $\beta$ -glucuronidase treated PHY906 (500 $\mu$ g/ml) on dephosphorylation rate of SAPK/JNK(Thr183/Tyr185) in HepG2 cells after stimulated using H<sub>2</sub>O<sub>2</sub>(1mM) for 1h.  $\beta$ -actin was used as the loading control. **(C)** Western blotting analysis for the effect of *E.coli*  $\beta$ -glucuronidase treated PHY906 (500 $\mu$ g/ml), equivalent concentration of single herbs (G, P, S, Z), or ), equivalent concentration of one herbs deleted formula (-G, -P, -S, -Z) on dephosphorylation rate of ERK5(Thr218/Tyr220) and Erk1/2(Thr202/Tyr204) in HepG2 cells after stimulated using EGF (50ng/ml) for 10min. Details of experimental procedures are given in Materials and Methods.
